# Supplementary material for: Real-time Monitoring the Resistance and Compliance of Airway in Noninvasive Positive Pressure Support Ventilation
Source: Research Square preprint supplement (doi:10.21203/rs.3.rs-5274536/v1), 2025-12-05
Supplement: Supplementary file 1 [file 76ee6eb5ae68d2c40a55645e.xlsx]

## Sheet: analysis
	parameter	COPD			ARDS			COPD set value	ARDS set value
		（R=20，C=50）			（R=10，C=30）
		data	err	err%	data	err	err%
	calculated resistance（R）	21.569	1.569	0.07845	10.117	0.117	0.0117	20	10
		18.426	-1.574	-0.0787	10.75	0.75	0.075	20	10
		18.729	-1.271	-0.06355	10.903	0.903	0.0903	20	10
		20.485	0.485	0.02425	10.513	0.513	0.0513	20	10
		19.991	-0.009	-0.00045	10.606	0.606	0.0606	20	10
		20.464	0.464	0.0232	10.717	0.717	0.0717	20	10
	mean	19.944	-0.056	-0.0028	10.601	0.601	0.0601
	SD	1.18207	1.18207	0.0591036	0.27162	0.27162	0.027162
	|max err|		1.569	0.0785		0.903	0.0903
	P-value	0.912135	-	-	0.0028954	-	-
	caluluated compliance（C）	49.7512	-0.248756	-0.00497512	31.8471	1.84713	0.0615711	50	30
		52.356	2.35602	0.0471204	32.3625	2.36246	0.0787487	50	30
		50	0	0	32.3625	2.36246	0.0787487	50	30
		51.0204	1.02041	0.0204082	31.746	1.74603	0.0582011	50	30
		54.6448	4.64481	0.0928962	31.1526	1.15265	0.0384216	50	30
		47.8469	-2.15311	-0.0430622	30.03	0.03003	0.001001	50	30
	mean	50.9366	0.936562	0.0187312	31.5835	1.58346	0.052782
	SD	2.34952	2.34952	0.0469904	0.884124	0.884124	0.0294708
	|max err|		4.64481	0.0928962		2.36246	0.0787487
	P-value	0.373703	-	-	0.00710769	-	-					0.146667	0.24
	note: P-value=TTEST(array1,array,2,1)											11.5867	18.96
												10.4133	17.04	27.4533

## Sheet: copd
set in respirator:MODE=S,IPAP=15 cmH2O，EPAP=4 cmH2O，ΔP=2 cmH2O
set in ASL5000：BPM=18/min (T=3.33s, Tin=1.93s), R=20 cmH2O.s/L, C=50 mL/cmH2O, EFFORT=24 cmH2O									calculated								data used for calculaing
t(s)	P(cmH2O)	Q(L/min)	V(mL)	ΔP(cmH2O)	ΔQ(L/min)	ΔV(mL)	ΔV/ΔQ	ΔP/ΔQ	R=	C=							t(s)	P(cmH2O)	Q(L/min)	V(mL)
0	15.6	59.3	636.8						21.569	49.7512	#1						1.827	2.1	-22	468.8	#1
0.032	15.9	59.3	667.7						18.426	52.356	#2						1.859	2.2	-21.4	457.7
0.064	16.1	59.8	698.8						18.729	50	#3						1.891	2.1	-20.7	446.9
0.096	15.9	60.2	730.2						20.485	51.0204	#4						1.923	2.2	-20.1	436.4
0.128	16.1	60.1	761.5						19.991	54.6448	#5						1.955	2.1	-19.4	426.3
0.16	16.2	60.3	792.9						20.464	47.8469	#6						1.987	2.2	-18.9	416.5
0.192	15.7	60	824.1						19.944	50.9366	mean						2.019	2.2	-18.3	406.9
0.224	16	59.1	854.9						1.18207	2.34952	SD						2.051	2.1	-17.7	397.7
0.256	16.2	58.9	885.6						3.3138	0.0928962	|max err|%						2.083	2.2	-17.3	388.7
0.288	15.9	58.8	916.2														5.417	2.2	-22.3	474.6	#2
0.321	16.2	57.9	946.3														5.449	2.2	-21.7	463.3
0.353	16.3	57.6	976.3														5.481	2.1	-20.9	452.4
0.385	16	57	1006														5.513	2.2	-20.4	441.7
0.417	16	55.7	1035														5.545	2.2	-19.7	431.5
0.449	16.2	54.7	1063.5														5.577	2.1	-19.1	421.5
0.481	16.2	54	1091.6														5.609	2.2	-18.6	411.8
0.513	16.2	53	1119.2														5.641	2.1	-17.9	402.5
0.545	16.3	52	1146.3														5.673	2.2	-17.6	393.3
0.577	16.4	51	1172.9														9.038	2.2	-22.3	471.7	#3
0.609	16.1	49.7	1198.8														9.071	2.2	-21.5	460.5
0.641	15.8	47.8	1223.7														9.103	2.1	-20.9	449.6
0.673	14.7	45.3	1247.3														9.135	2.2	-20.3	439.1
0.705	13.1	41.1	1268.7														9.167	2.1	-19.6	428.9
0.737	8.9	34.5	1286.7														9.199	2.2	-19.1	418.9
0.769	7.9	24	1299.2														9.231	2.2	-18.4	409.3
0.801	8.3	17.7	1308.5														9.263	2.1	-17.9	400
0.833	5.9	14	1315.7														9.295	2.2	-17.4	390.9
0.865	5.9	7.7	1319.8														12.272	2.1	-22.6	478.7	#4
0.897	5.7	4.1	1321.9														12.304	2.1	-22.1	467.2
0.929	4.6	0.8	1322.3														12.336	2.2	-21.4	456
0.962	5.1	-3.3	1320.6														12.368	2.1	-20.6	445.3
0.994	4.5	-5.9	1317.5														12.4	2.1	-20	434.9
1.026	4.3	-9.3	1312.7														12.432	2.2	-19.4	424.7
1.058	4	-36.2	793.8														12.464	2.1	-18.8	415
1.09	4.1	-35.1	775.5														12.496	2.2	-18.3	405.4
1.122	4.2	-33.8	757.9														12.528	2.1	-17.6	396.2
1.154	4.1	-32.6	741														15.92	2.1	-22.2	471.8	#5
1.186	4.2	-31.7	724.5														15.952	2.1	-21.7	460.5
1.218	4.2	-30.5	708.6														15.984	2.2	-20.9	449.6
1.25	4.2	-29.5	693.2														16.016	2.1	-20.2	439.1
1.282	4.2	-28.6	678.3														16.048	2.2	-19.7	428.9
1.314	4.2	-27.7	663.9														16.08	2.1	-18.9	419
1.346	4.2	-26.9	649.9														16.112	2.2	-18.5	409.4
1.378	4.2	-26.1	636.3														16.144	2.2	-17.9	400
1.41	4.4	-25.1	623.2														16.176	2.1	-17.3	391
1.442	4.1	-24.2	610.6														19.504	2.2	-22.6	482.8	#6
1.474	4.5	-23.6	598.3	pulse width(Δt)=		0.641											19.536	2.2	-22.1	471.3
1.506	4.3	-22.5	586.6	satrt													19.568	2.2	-21.4	460.1
1.538	3.9	-22.1	575.1														19.6	2.1	-20.8	449.3
1.571	3.3	-22.4	563.4														19.632	2.3	-20.2	438.8
1.603	3.2	-22.9	551.5														19.664	2.1	-19.5	428.6
1.635	2.9	-22.9	539.5								R=	21.569					19.696	2.1	-19	418.7
1.667	2.8	-23	527.6	ΔP	ΔQ	ΔV	x	y	n		C=	49.7512					19.728	2.3	-18.4	409.1
1.699	2.4	-22.9	515.7														19.76	2.1	-17.8	399.9
1.731	2.4	-22.9	503.7
1.763	2.2	-22.6	491.9
1.795	2.1	-22.4	480.3
1.827	2.1	-22	468.8	-2.2	0.5	-117.8	-14136	-264	1
1.859	2.2	-21.4	457.7	-2.1	1.1	-128.9	-7030.91	-114.545	2
1.891	2.1	-20.7	446.9	-2.2	1.8	-139.7	-4656.67	-73.3333	3
1.923	2.2	-20.1	436.4	-2.1	2.4	-150.2	-3755	-52.5	4
1.955	2.1	-19.4	426.3	-2.2	3.1	-160.3	-3102.58	-42.5806	5
1.987	2.2	-18.9	416.5	-2.1	3.6	-170.1	-2835	-35	6
2.019	2.2	-18.3	406.9	-2.1	4.2	-179.7	-2567.14	-30	7
2.051	2.1	-17.7	397.7	-2.2	4.8	-188.9	-2361.25	-27.5	8
2.083	2.2	-17.3	388.7	-2.1	5.2	-197.9	-2283.46	-24.2308	9
2.115	2.1	-16.6	380.1
2.147	2.1	-15.5	372	end
2.179	2	-13.3	365.1
2.212	2	-10.5	359.6
2.244	3.6	-7	356
2.276	3.7	-1.4	355.3
2.308	3.6	2.5	356.5
2.34	4	5.6	359.5
2.372	3.7	8.6	364
2.404	4.7	11.4	369.9
2.436	6.2	15.6	378
2.468	8	21.4	389.2
2.5	9.6	28.1	403.8
2.532	11.1	34.5	421.8
2.564	12.4	40.5	442.9
2.596	13.4	45.7	466.7
2.628	14.4	50	492.8
2.66	15	53.7	520.8
2.692	15.3	56.4	550.1
2.724	15.8	58.4	580.5
2.756	15.5	59.8	611.7
2.788	15.8	60.1	643
2.821	15.9	60.6	674.6
2.853	16	61.1	706.4
2.885	16	61.2	738.3
2.917	16.1	61.2	770.1
2.949	16.1	61.2	802
2.981	15.9	60.7	833.6
3.013	16.1	60	864.8
3.045	16.2	59.6	895.9
3.077	16	59.4	926.8
3.109	16.1	58.4	957.3
3.141	16.3	57.9	987.4
3.173	16	57.2	1017.2
3.205	16	55.9	1046.3
3.237	16.1	54.7	1074.8
3.269	16.1	53.8	1102.8
3.301	16.2	52.7	1130.2
3.333	16.3	51.6	1157.1
3.365	16.3	50.6	1183.5
3.397	16.1	49.2	1209.1
3.429	16.4	47.3	1233.8
3.462	15.8	45.8	1257.7
3.494	14.4	42.6	1279.9
3.526	11.8	37.3	1299.3
3.558	8	28.4	1314.1
3.59	8.5	18.2	1323.6
3.622	7.6	13.7	1330.7
3.654	5.3	8.5	1335.1
3.686	6.1	2	1336.2
3.718	5.2	-1	1335.7
3.75	4.6	-5.2	1333
3.782	5.3	-8.8	1328.4
3.814	3.9	-11.4	1322.4
3.846	4.4	-15.8	1314.2
3.878	4.5	-18.5	1304.6
3.91	3.9	-21.4	1293.4
3.942	4.6	-24.9	1280.5
3.974	4.5	-27	1266.4
4.006	4.3	-29.9	1250.9
4.038	4.6	-33	1233.7
4.071	4.6	-35.5	1215.2
4.103	4.5	-38.4	1195.1
4.135	4.6	-41.4	1173.6
4.167	4.8	-44.2	1150.6
4.199	5	-46.6	1126.3
4.231	5	-48.8	1100.8
4.263	4.9	-49.3	1075.2
4.295	4.7	-48.8	1049.7
4.327	4.6	-47.9	1024.8
4.359	4.5	-46.9	1000.4
4.391	4.4	-45.9	976.5
4.423	4.4	-44.7	953.2
4.455	4.4	-43.4	930.5
4.487	4.2	-42.2	908.6
4.519	4.2	-41.1	887.2
4.551	4.1	-40.1	866.3
4.583	4.1	-39.1	845.9
4.615	4.1	-37.9	826.1
4.647	4.1	-36.8	807
4.679	4.1	-35.7	788.4
4.712	4.3	-34.5	770.4
4.744	4.2	-33.1	753.1
4.776	4.2	-32.1	736.4
4.808	4.3	-31.1	720.2
4.84	4.3	-30.1	704.5
4.872	4.2	-29.1	689.4
4.904	4.2	-28.3	674.6
4.936	4.2	-27.4	660.3
4.968	4.1	-26.7	646.4
5	4.2	-25.9	632.9
5.032	4.1	-25.1	619.8
5.064	4.4	-24.4	607.1	pulse width(Δt)=		0.641
5.096	4.2	-23.3	595	satrt
5.128	3.7	-22.8	583.1
5.16	3.3	-23.1	571.1
5.192	3.2	-23.5	558.8
5.224	2.9	-23.4	546.7
5.256	2.7	-23.4	534.4	ΔP	ΔQ	ΔV	x	y	n
5.288	2.5	-23.4	522.3
5.321	2.4	-23.3	510.1								R=	18.426
5.353	2.2	-23.1	498.1								C=	52.356
5.385	2.1	-22.8	486.2
5.417	2.2	-22.3	474.6	-2	1	-120.4	-7224	-120	1
5.449	2.2	-21.7	463.3	-2	1.6	-131.7	-4938.75	-75	2
5.481	2.1	-20.9	452.4	-2.1	2.4	-142.6	-3565	-52.5	3
5.513	2.2	-20.4	441.7	-2	2.9	-153.3	-3171.72	-41.3793	4
5.545	2.2	-19.7	431.5	-2	3.6	-163.5	-2725	-33.3333	5
5.577	2.1	-19.1	421.5	-2.1	4.2	-173.5	-2478.57	-30	6
5.609	2.2	-18.6	411.8	-2	4.7	-183.2	-2338.72	-25.5319	7
5.641	2.1	-17.9	402.5	-2.1	5.4	-192.5	-2138.89	-23.3333	8
5.673	2.2	-17.6	393.3	-2	5.7	-201.7	-2123.16	-21.0526	9
5.705	2.2	-16.9	384.5
5.737	2.2	-16.3	376	end
5.769	2.1	-15.2	368.1
5.801	2.1	-12.9	361.4
5.833	3.6	-9.4	356.5
5.865	3.5	-3.9	354.4
5.897	3.7	-0.2	354.4
5.929	4	3.3	356.1
5.962	3.6	6.4	359.4
5.994	4.3	8.8	364
6.026	4.8	12.2	370.4
6.058	6.7	16.5	379
6.09	8.4	22.8	390.9
6.122	10.1	29.6	406.3
6.154	11.5	35.9	425
6.186	12.8	41.7	446.7
6.218	13.7	46.8	471.1
6.25	14.4	50.8	497.5
6.282	15.1	54.1	525.7
6.314	15.4	56.6	555.2
6.346	15.6	58.2	585.5
6.378	15.9	59.4	616.5
6.41	15.6	60.4	647.9
6.442	15.9	60.3	679.3
6.474	16	60.8	711
6.506	16	61	742.7
6.538	16.1	61	774.5
6.571	15.8	60.8	806.2
6.603	16	60.1	837.5
6.635	16.2	59.9	868.7
6.667	16.1	59.8	899.8
6.699	16.1	59.1	930.5
6.731	16.1	58.4	961
6.763	16	57.6	991
6.795	16.4	56.6	1020.5
6.827	16.2	56.1	1049.7
6.859	16.2	55	1078.4
6.891	16.2	53.9	1106.4
6.923	16.2	52.7	1133.9
6.955	16.4	51.5	1160.7
6.987	16.5	50.5	1187
7.019	16.2	49.3	1212.7
7.051	16.1	47.3	1237.4
7.083	15.1	45	1260.8
7.115	13.6	41	1282.2
7.147	10	34.7	1300.2
7.179	7.8	24.5	1313
7.212	8.6	16.6	1321.6
7.244	6.5	12.8	1328.3
7.276	5.4	6.5	1331.7
7.308	6.1	1.5	1332.5
7.34	4.6	-1.5	1331.7
7.372	4.9	-6	1328.5
7.404	4.9	-8.7	1324
7.436	3.9	-12	1317.8
7.468	4.6	-16.1	1309.4
7.5	4.2	-18.3	1299.9
7.532	4	-21.6	1288.6
7.564	4.8	-24.7	1275.8
7.596	4.3	-26.7	1261.9
7.628	4.3	-30	1246.3
7.66	4.7	-32.9	1229.1
7.692	4.5	-35.4	1210.7
7.724	4.5	-38.4	1190.6
7.756	4.6	-41.4	1169.1
7.788	4.8	-44.1	1146.1
7.821	4.9	-46.6	1121.8
7.853	5.1	-48.8	1096.4
7.885	4.9	-49.1	1070.8
7.917	4.7	-48.6	1045.5
7.949	4.6	-47.7	1020.7
7.981	4.4	-46.7	996.4
8.013	4.4	-45.6	972.6
8.045	4.4	-44.4	949.5
8.077	4.4	-43.2	927
8.109	4.3	-42	905.1
8.141	4	-41	883.8
8.173	4.1	-40.1	862.8
8.205	4.1	-39	842.5
8.237	4.1	-37.7	822.9
8.269	4.1	-36.6	803.8
8.301	4.1	-35.5	785.3
8.333	4.2	-34.3	767.5
8.365	4.2	-33	750.2
8.397	4.2	-32	733.6
8.429	4.3	-31	717.5
8.462	4.2	-29.9	701.9
8.494	4.2	-29	686.8
8.526	4.2	-28.2	672.1
8.558	4.2	-27.3	657.9
8.59	4.2	-26.5	644.1
8.622	4.2	-25.7	630.6
8.654	4.1	-25	617.6
8.686	4.3	-24.3	605	pulse width(Δt)=		0.641
8.718	4.3	-23.3	592.8	satrt
8.75	3.3	-22.9	580.9
8.782	3.4	-23.6	568.6
8.814	3	-23.6	556.3
8.846	2.8	-23.7	544
8.878	2.6	-23.6	531.7	ΔP	ΔQ	ΔV	x	y	n
8.91	2.4	-23.6	519.4
8.942	2.3	-23.4	507.2								R=	18.729
8.974	2.2	-23.1	495.2								C=	50
9.006	2.1	-22.8	483.3
9.038	2.2	-22.3	471.7	-2.1	1	-121.1	-7266	-126	1
9.071	2.2	-21.5	460.5	-2.1	1.8	-132.3	-4410	-70	2
9.103	2.1	-20.9	449.6	-2.2	2.4	-143.2	-3580	-55	3
9.135	2.2	-20.3	439.1	-2.1	3	-153.7	-3074	-42	4
9.167	2.1	-19.6	428.9	-2.2	3.7	-163.9	-2657.84	-35.6757	5
9.199	2.2	-19.1	418.9	-2.1	4.2	-173.9	-2484.29	-30	6
9.231	2.2	-18.4	409.3	-2.1	4.9	-183.5	-2246.94	-25.7143	7
9.263	2.1	-17.9	400	-2.2	5.4	-192.8	-2142.22	-24.4444	8
9.295	2.2	-17.4	390.9	-2.1	5.9	-201.9	-2053.22	-21.3559	9
9.327	2.1	-16.8	382.2
9.359	2.1	-16.3	373.7	end
9.391	2	-15.1	365.8
9.423	2.7	-12.6	359.3
9.455	3.9	-8	355.1
9.487	3.3	-3	353.6
9.519	4.2	0.2	353.7
9.551	3.7	4	355.7
9.583	3.9	6.6	359.2
9.615	5.6	9.9	364.3
9.647	7.1	15.6	372.5
9.679	9	22.1	384
9.712	10.6	29.1	399.1
9.744	12	35.5	417.6
9.776	13.1	41.2	439.1
9.808	14	46.1	463.1
9.84	14.7	50	489.1
9.872	15.2	53.2	516.8
9.904	15.4	55.6	545.8
9.936	15.6	57.1	575.5
9.968	16	58.3	605.9
10	3.6	-2.2	355.2
10.032	3.6	1.6	356.1
10.064	4	4.8	358.6
10.096	3.5	7.9	362.7
10.128	4.7	10.4	368.1
10.16	6.1	14.9	375.8
10.192	8	20.7	386.6
10.224	9.6	27.5	401
10.256	11.2	34	418.7
10.288	12.4	40.1	439.6
10.32	13.5	45.2	463.1
10.352	14.3	49.7	489
10.384	15	53.2	516.7
10.416	15.4	55.9	545.8
10.448	15.7	58.1	576.1
10.48	15.5	59.4	607.1
10.512	15.9	59.8	638.2
10.544	16	60.5	669.7
10.576	16.1	60.9	701.5
10.608	15.7	61.1	733.3
10.64	16	60.6	764.8
10.672	16.1	60.6	796.4
10.704	16.1	60.6	828
10.736	16	60.3	859.3
10.768	16	59.5	890.3
10.8	16.2	59	921.1
10.832	15.9	58.5	951.6
10.864	16.3	57.5	981.6
10.896	16.2	57.2	1011.3
10.928	16	56.2	1040.6
10.96	16.1	55	1069.2
10.992	16.1	54	1097.3
11.024	16.3	52.9	1124.9
11.056	16.3	51.9	1151.9
11.088	16	50.7	1178.3
11.12	5	-49.3	1086.1
11.152	4.8	-49	1060.6
11.184	4.7	-48.3	1035.4
11.216	4.6	-47.3	1010.8
11.248	4.4	-46.3	986.7
11.28	4.4	-45.2	963.1
11.312	4.4	-44	940.2
11.344	4.3	-42.7	918
11.376	4.2	-41.6	896.3
11.408	4.1	-40.6	875.2
11.44	4.1	-39.6	854.6
11.472	4.1	-38.5	834.6
11.504	4.1	-37.3	815.1
11.536	4.3	-36.1	796.3
11.568	4.1	-34.8	778.2
11.6	4.2	-33.8	760.6
11.632	4.2	-32.7	743.6
11.664	4.2	-31.6	727.1
11.696	4.3	-30.6	711.2
11.728	4.2	-29.5	695.8
11.76	4.2	-28.6	680.9
11.792	4.2	-27.8	666.4
11.824	4.2	-27	652.3
11.856	4.2	-26.2	638.7
11.888	4.1	-25.4	625.4
11.92	4.4	-24.6	612.6	pulse width(Δt)=		0.64
11.952	4.2	-23.5	600.3	satrt
11.984	3.8	-23	588.4
12.016	3.3	-23.3	576.2
12.048	3.2	-23.8	563.9
12.08	2.8	-23.7	551.5
12.112	2.7	-23.8	539.1	ΔP	ΔQ	ΔV	x	y	n
12.144	2.5	-23.7	526.8
12.176	2.4	-23.5	514.6								R=	20.485
12.208	2.2	-23.3	502.4								C=	51.0204
12.24	2.2	-23	490.4
12.272	2.1	-22.6	478.7	-2.1	0.9	-121.6	-8106.67	-140	1
12.304	2.1	-22.1	467.2	-2.1	1.4	-133.1	-5704.29	-90	2
12.336	2.2	-21.4	456	-2	2.1	-144.3	-4122.86	-57.1429	3
12.368	2.1	-20.6	445.3	-2.1	2.9	-155	-3206.9	-43.4483	4
12.4	2.1	-20	434.9	-2.1	3.5	-165.4	-2835.43	-36	5
12.432	2.2	-19.4	424.7	-2	4.1	-175.6	-2569.76	-29.2683	6
12.464	2.1	-18.8	415	-2.1	4.7	-185.3	-2365.53	-26.8085	7
12.496	2.2	-18.3	405.4	-2	5.2	-194.9	-2248.85	-23.0769	8
12.528	2.1	-17.6	396.2	-2.1	5.9	-204.1	-2075.59	-21.3559	9
12.56	2.1	-17.1	387.3
12.592	2.2	-16.6	378.7	end
12.624	2	-15.8	370.4
12.656	2.1	-14.3	363
12.688	3.6	-10.8	357.4
12.72	3.6	-5.4	354.6
12.752	3.6	-1.5	353.8
12.784	4	1.9	354.7
12.816	3.7	5.1	357.4
12.848	3.9	7.6	361.4
12.88	4.1	10.5	366.8
12.912	4.6	13.2	373.7
12.944	6.6	17.3	382.7
12.976	8.2	23.5	394.9
13.008	9.9	30	410.6
13.04	11.4	36.4	429.6
13.072	12.5	42.2	451.6
13.104	13.7	47.1	476.1
13.136	14.5	51.5	502.9
13.168	15.1	54.9	531.5
13.2	15.7	57.5	561.5
13.232	15.5	59.4	592.4
13.264	15.8	60	623.7
13.296	15.9	60.7	655.3
13.328	16	61.3	687.2
13.36	16	61.6	719.3
13.392	16.1	61.5	751.3
13.424	16.1	61.4	783.3
13.456	16.1	61.2	815.1
13.488	16.1	60.8	846.8
13.52	16	60.2	878.2
13.552	16.2	59.5	909.2
13.584	16.1	59.2	940
13.616	16	58.4	970.4
13.648	16.3	57.3	1000.2
13.68	16.1	56.8	1029.8
13.712	16.1	55.7	1058.9
13.744	16.2	54.5	1087.3
13.776	16.1	53.5	1115.1
13.808	16.3	52.3	1142.3
13.84	16.4	51.3	1169.1
13.872	16.1	50.1	1195.1
13.904	16.3	48.1	1220.2
13.936	16.4	46.8	1244.6
13.968	15.7	45.1	1268.1
14	14.6	41.7	1289.8
14.032	12.4	36.7	1308.9
14.064	8.1	28.4	1323.7
14.096	8.4	17.5	1332.8
14.128	7.9	12.4	1339.3
14.16	5.4	7.4	1343.1
14.192	6.2	0.7	1343.5
14.224	5.4	-2.5	1342.2
14.256	4.7	-6.7	1338.7
14.288	5.4	-10.4	1333.3
14.32	4	-13.2	1326.4
14.352	4.5	-17.7	1317.2
14.384	4.5	-20.4	1306.6
14.416	4	-23.4	1294.4
14.448	4.6	-26.8	1280.4
14.48	4.5	-28.9	1265.4
14.512	4.3	-31.9	1248.7
14.544	4.7	-35	1230.5
14.576	4.6	-37.5	1211
14.608	4.6	-40.3	1190
14.64	4.7	-43.3	1167.5
14.672	4.9	-45.9	1143.6
14.704	5.2	-48.2	1118.4
14.736	5	-49.5	1092.7
14.768	4.8	-49.4	1066.9
14.8	4.7	-48.6	1041.6
14.832	4.6	-47.6	1016.8
14.864	4.4	-46.5	992.6
14.896	4.3	-45.5	968.9
14.928	4.3	-44.4	945.7
14.96	4.2	-43.4	923.1
14.992	4.2	-42.2	901.2
15.024	4.1	-41	879.8
15.056	3.9	-39.9	859.1
15.088	4	-39	838.7
15.12	4	-37.8	819.1
15.152	4	-36.6	800
15.184	4.2	-35.5	781.6
15.216	4.2	-34.1	763.8
15.248	4.1	-33	746.6
15.28	4.2	-32	729.9
15.312	4.2	-30.9	713.8
15.344	4.2	-29.8	698.3
15.376	4.3	-28.9	683.2
15.408	4.2	-27.9	668.7
15.44	4.2	-27.1	654.6
15.472	4.2	-26.3	640.8
15.504	4.3	-25.4	627.6
15.536	4.2	-24.5	614.8
15.568	4.4	-23.9	602.4
15.6	4.3	-22.9	590.5	pulse width(Δt)=		0.64
15.632	4	-22.4	578.8	satrt
15.664	3.3	-22.5	567.1
15.696	3.3	-23	555.1
15.728	2.9	-23	543.1
15.76	2.8	-23.2	531
15.792	2.4	-23.1	519	ΔP	ΔQ	ΔV	x	y	n
15.824	2.4	-23.1	507
15.856	2.2	-22.8	495.1								R=	19.991
15.888	2.2	-22.6	483.4								C=	54.6448
15.92	2.1	-22.2	471.8	-1.9	0.2	-107	-32100	-570	1
15.952	2.1	-21.7	460.5	-1.9	0.7	-118.3	-10140	-162.857	2
15.984	2.2	-20.9	449.6	-1.8	1.5	-129.2	-5168	-72	3
16.016	2.1	-20.2	439.1	-1.9	2.2	-139.7	-3810	-51.8182	4
16.048	2.2	-19.7	428.9	-1.8	2.7	-149.9	-3331.11	-40	5
16.08	2.1	-18.9	419	-1.9	3.5	-159.8	-2739.43	-32.5714	6
16.112	2.2	-18.5	409.4	-1.8	3.9	-169.4	-2606.15	-27.6923	7
16.144	2.2	-17.9	400	-1.8	4.5	-178.8	-2384	-24	8
16.176	2.1	-17.3	391	-1.9	5.1	-187.8	-2209.41	-22.3529	9
16.208	2.2	-16.9	382.2
16.24	2.2	-16	373.9	end
16.272	2.1	-14.1	366.6
16.304	2.1	-11.5	360.6
16.336	3.5	-8	356.5
16.368	3.6	-2.5	355.2
16.4	3.6	1.4	355.9
16.432	4	4.6	358.3
16.464	3.5	7.7	362.3
16.496	4.2	10.1	367.5
16.528	4.6	13.4	374.5
16.56	6.8	17.5	383.6
16.592	8.3	24	396.2
16.624	9.9	30.4	412
16.656	11.6	36.7	431.1
16.688	12.6	42.6	453.3
16.72	13.7	47.4	478
16.752	14.6	51.6	504.9
16.784	14.9	55	533.5
16.816	15.5	57.3	563.3
16.848	15.8	59.2	594.2
16.88	15.5	60.4	625.6
16.912	15.9	60.6	657.2
16.944	16	61.2	689
16.976	15.9	61.5	721.1
17.008	16	61.4	753.1
17.04	16.1	61.4	785
17.072	15.9	61.2	816.9
17.104	16	60.3	848.3
17.136	16.2	60	879.5
17.168	16.2	59.8	910.7
17.2	16	59.2	941.6
17.232	16.3	58.3	971.9
17.264	16.1	57.7	1002
17.296	16	56.6	1031.4
17.328	16.5	55.6	1060.4
17.36	16.3	55.2	1089.1
17.392	16.1	53.8	1117.1
17.424	16.3	52.2	1144.3
17.456	16.3	51.2	1170.9
17.488	16.1	49.8	1196.9
17.52	16.2	47.9	1221.8
17.552	16.6	46.5	1246.1
17.584	15.8	45.2	1269.6
17.616	14.5	41.7	1291.3
17.648	11.9	36.4	1310.3
17.68	8	27.3	1324.5
17.712	8.5	16.7	1333.2
17.744	7.7	12.1	1339.5
17.776	5.3	6.8	1343.1
17.808	6.1	0.3	1343.2
17.84	5.2	-2.8	1341.8
17.872	4.7	-7.1	1338.1
17.904	5.2	-10.7	1332.6
17.936	4	-13.6	1325.5
17.968	4.5	-17.9	1316.2
18	4.3	-20.6	1305.4
18.032	4	-23.7	1293.1
18.064	4.6	-26.9	1279.1
18.096	4.4	-29.2	1263.9
18.128	4.3	-32.1	1247.1
18.16	4.7	-35.2	1228.8
18.192	4.6	-37.6	1209.2
18.224	4.6	-40.5	1188.2
18.256	4.7	-43.4	1165.6
18.288	4.9	-46	1141.6
18.32	5.1	-48.4	1116.4
18.352	5	-49.5	1090.6
18.384	4.8	-49.3	1064.9
18.416	4.7	-48.6	1039.6
18.448	4.6	-47.5	1014.9
18.48	4.4	-46.4	990.7
18.512	4.3	-45.4	967
18.544	4.2	-44.3	943.9
18.576	4.3	-43.2	921.4
18.608	4.2	-41.9	899.6
18.64	4.1	-40.8	878.4
18.672	4	-39.7	857.7
18.704	4	-38.8	837.5
18.736	4.1	-37.7	817.8
18.768	4	-36.4	798.8
18.8	4.2	-35.3	780.5
18.832	4.3	-33.8	762.8
18.864	4	-32.6	745.8
18.896	4.2	-31.9	729.2
18.928	4.3	-30.8	713.2
18.96	4.2	-29.8	697.7
18.992	4.2	-28.8	682.7
19.024	4.2	-28	668.1
19.056	4.2	-27.1	654
19.088	4.2	-26.3	640.2
19.12	4.4	-25.4	627
19.152	4.2	-24.4	614.3
19.184	4.3	-23.8	601.9	pulse width(Δt)=		0.64
19.216	4.4	-22.9	589.9	satrt
19.248	3.8	-22.2	578.4
19.28	3.4	-22.7	566.6
19.312	3.3	-23	554.6
19.344	2.8	-23.1	542.6
19.376	2.8	-23.2	530.5	ΔP	ΔQ	ΔV	x	y	n
19.408	2.4	-23.1	518.5
19.44	2.4	-23.1	506.5								R=	20.464
19.472	2.2	-22.8	494.6								C=	47.8469
19.504	2.2	-22.6	482.8	-2.2	0.3	-107.1	-21420	-440	1
19.536	2.2	-22.1	471.3	-2.2	0.8	-118.6	-8895	-165	2
19.568	2.2	-21.4	460.1	-2.2	1.5	-129.8	-5192	-88	3
19.6	2.1	-20.8	449.3	-2.3	2.1	-140.6	-4017.14	-65.7143	4
19.632	2.3	-20.2	438.8	-2.1	2.7	-151.1	-3357.78	-46.6667	5
19.664	2.1	-19.5	428.6	-2.3	3.4	-161.3	-2846.47	-40.5882	6
19.696	2.1	-19	418.7	-2.3	3.9	-171.2	-2633.85	-35.3846	7
19.728	2.3	-18.4	409.1	-2.1	4.5	-180.8	-2410.67	-28	8
19.76	2.1	-17.8	399.9	-2.3	5.1	-190	-2235.29	-27.0588	9
19.792	2.2	-17.3	390.9
19.824	2.1	-16.7	382.2	end
19.856	2	-16	373.8
19.888	2	-14.2	366.4
19.92	2.1	-11.4	360.5
19.952	3.6	-7.8	356.4

## Sheet: ards
set in respirator:MODE=S, IPAP=15, EPAP=4,ΔP=2
set in ASL5000: BPM=25 (T=2.4s, Tin= 1.13), R=10, C=30, EFFORT=21									calculated								data used for calculaing
t(s)	P(cmH2O)	Q(L/min)	V(mL)	ΔP(cmH2O)	ΔQ(L/min)	ΔV(mL)	ΔV/ΔQ	ΔP/ΔQ	R=	C=							t(s)	P(cmH2O)	Q(L/min)	V(mL)
0	6.5	-70.5	722.9						10.117	31.8471	#1						1.154	2.3	-9.9	120.2	#1
0.032	6.6	-74.1	684.3						10.75	32.3625	#2						1.186	2.3	-10.1	112.9
0.064	6.8	-77.7	643.9						10.903	32.3625	#3						1.218	2.2	-9.5	108.7
0.096	6.6	-79.7	602.3			1.128			10.513	31.746	#4						1.25	2.1	-9	105.9
0.128	6	-77.4	562						10.606	31.1526	#5						1.282	2.1	-8.3	101.6
0.16	5.5	-73.5	523.7						10.717	30.03	#6						1.314	2.1	-7.5	97.7
0.192	4.9	-69.6	487.5						10.601	31.5835	mean						1.346	2.1	-6.6	94.2
0.224	4.4	-65.7	453.3						0.27162	0.884124	SD						1.378	2.2	-6	91.1
0.256	4	-61.8	421.1						1.1806	-0.352751	|max err|%						3.718	2.4	-9.3	125.4	#2
0.288	3.7	-58	390.9														3.75	2.3	-9.7	120.4
0.321	3.4	-54.3	362.6														3.782	2.1	-10.5	115.2
0.353	3.2	-50.5	336.3														3.814	2.1	-10.8	110.1
0.385	3	-46.7	311.9														3.846	2.1	-9.8	105.3
0.417	2.9	-43.1	289.5														3.878	2.1	-8.8	101.1
0.449	3	-39.2	269.1														3.91	2.1	-7.4	97.2
0.481	3	-35.1	250.8														3.942	2.1	-6.6	93.7
0.513	3.1	-31.6	234.3														6.314	2.4	-9.2	123.6	#3
0.545	3.2	-27.9	219.8														6.346	2.2	-9.6	118.6
0.577	3.4	-24.4	207.1														6.378	2.1	-9.8	113.5
0.609	3.7	-21	196.2														6.41	2.1	-9.6	108.5
0.641	3.7	-17.4	187.1														6.442	2.1	-8.8	103.9
0.673	3.9	-14.9	179.4														6.474	2.1	-8	99.8
0.705	3.8	-12.7	172.7														6.506	2.1	-7.1	96.1
0.737	4.1	-11.1	166.9														6.538	2.1	-6.4	92.8
0.769	4	-9.3	162.1														8.59	2.4	-9.5	123.8	#4
0.801	4.2	-8.1	157.9														8.622	2.2	-9.9	118.7
0.833	4.3	-6.6	154.4														8.654	2.2	-10.1	113.4
0.865	4.2	-5.5	151.6														8.686	2.1	-9.5	108.5
0.897	4.3	-4.6	149.2														8.718	2.1	-8.8	103.9
0.929	4.4	-3.9	147.1	pulse width(Δt)=		0.48											8.75	2.1	-7.9	99.8
0.962	4.2	-3.3	141.4	satrt													8.782	2.1	-7.1	96.1
0.994	3.4	-4.4	141.5														8.814	2.1	-6.4	92.8
1.026	3.3	-6.5	139.7														11.408	2.3	-9.9	121.9	#5
1.058	3	-7.7	135.7														11.44	2.1	-10.1	116.7
1.09	2.7	-8.7	131.2								R=	10.117					11.472	2.1	-10.1	111.4
1.122	2.4	-9.4	126.3	ΔP	ΔQ	ΔV	x	y	n		C=	31.8471					11.504	2.1	-9.5	106.4
1.154	2.3	-9.9	120.2	-1.9	-6.6	-21.2	192.727	17.2727	1								11.536	2.1	-8.5	102
1.186	2.3	-10.1	112.9	-1.9	-6.8	-28.5	251.471	16.7647	2								11.568	2.1	-7.7	98
1.218	2.2	-9.5	108.7	-2	-6.2	-32.7	316.452	19.3548	3								11.6	2.1	-6.7	94.5
1.25	2.1	-9	105.9	-2.1	-5.7	-35.5	373.684	22.1053	4								11.632	2.1	-6.1	91.4
1.282	2.1	-8.3	101.6	-2.1	-5	-39.8	477.6	25.2	5								13.712	2.4	-9.4	121.9	#6
1.314	2.1	-7.5	97.7	-2.1	-4.2	-43.7	624.286	30	6								13.744	2.2	-9.8	118.8
1.346	2.1	-6.6	94.2	-2.1	-3.3	-47.2	858.182	38.1818	7								13.776	2.2	-10.1	115.6
1.378	2.2	-6	91.1	-2	-2.7	-50.3	1117.78	44.4444	8								13.808	2	-10.6	106.5
1.41	2.1	-5.3	88.3														13.84	2.2	-9.2	101.9
1.442	2.1	-4.7	85.9	end													13.872	2.1	-8	100.7
1.474	2.8	-1.1	85.3														13.904	2.1	-7.3	96.9
1.506	3.1	9.6	90.3														13.936	2.1	-6.5	93.5
1.538	3.4	18.9	100.2																		#7
1.571	4.1	27.6	114.6
1.603	5.6	37.7	134.2
1.635	7	49.3	159.9
1.667	8.5	60.7	191.5
1.699	9.8	70.9	228.4
1.731	11.1	79	269.6
1.763	12.5	86.2	314.5
1.795	13.2	91.5	362.1																		#8
1.827	14.3	94.6	411.4
1.859	14.9	96.2	461.5
1.891	15.4	96.1	511.5
1.923	15.7	94.4	560.7
1.955	16	91.5	608.4
1.987	16.3	87.8	654.1
2.019	16.7	84.1	697.9
2.051	16.6	79.6	739.4
2.083	16.9	74.1	778
2.115	16.9	68.9	813.9
2.147	16.9	62.8	846.6
2.179	17.2	56.7	876.1
2.212	17	50.3	902.3
2.244	16.3	41.9	924.1
2.276	13.9	30.4	939.9
2.308	9.6	9.6	944.9
2.34	9.9	-14.7	937.2
2.372	7.6	-26.1	923.6
2.404	6.7	-41.7	901.9
2.436	6.9	-51.6	875
2.468	6.6	-57.8	844.9
2.5	6.7	-63	812.1
2.532	6.4	-67.6	776.9
2.564	6.7	-72.5	739.1
2.596	6.7	-75.9	699.6
2.628	6.9	-79.5	658.2
2.66	6.9	-81.4	615.8
2.692	6.2	-78.7	574.8
2.724	5.6	-74.9	535.8
2.756	5	-70.9	498.9
2.788	4.6	-67.1	463.9
2.821	4.2	-63.1	431
2.853	3.8	-59.2	400.2
2.885	3.5	-55.5	371.3
2.917	3.2	-51.7	344.4
2.949	3.1	-47.9	319.5
2.981	2.9	-44.2	296.4
3.013	3.1	-40.4	275.4
3.045	3	-36.2	256.5
3.077	3	-32.6	239.5
3.109	3.2	-29.1	224.4
3.141	3.3	-25.5	211.1
3.173	3.6	-22.1	199.6
3.205	3.7	-18.4	190
3.237	3.8	-15.6	181.9
3.269	3.8	-13.4	174.9
3.301	4.1	-11.7	168.8
3.333	4	-9.7	163.8
3.365	4.1	-8.4	159.4
3.397	4.3	-7	155.8
3.429	4.2	-5.6	152.9
3.462	4.3	-5.1	150.2
3.494	4.3	-4.3	148	pulse width(Δt)=
3.526	4.3	-3.6	146.1	satrt		0.448
3.558	4.1	-3.1	144.5
3.59	3.5	-4.5	142.2
3.622	3.2	-6.3	138.9
3.654	2.9	-7.8	134.8
3.686	2.7	-8.7	130.3	ΔP	ΔQ	ΔV	x	y	n		R=	10.75
3.718	2.4	-9.3	125.4	-1.9	-5.7	-20.7	217.895	20	1		C=	32.3625
3.75	2.3	-9.7	120.4	-2	-6.1	-25.7	252.787	19.6721	2
3.782	2.1	-10.5	115.2	-2.2	-6.9	-30.9	268.696	19.1304	3
3.814	2.1	-10.8	110.1	-2.2	-7.2	-36	300	18.3333	4
3.846	2.1	-9.8	105.3	-2.2	-6.2	-40.8	394.839	21.2903	5
3.878	2.1	-8.8	101.1	-2.2	-5.2	-45	519.231	25.3846	6
3.91	2.1	-7.4	97.2	-2.2	-3.8	-48.9	772.105	34.7368	7
3.942	2.1	-6.6	93.7	-2.2	-3	-52.4	1048	44	8
3.974	2.1	-5.9	90.7
4.006	2.1	-5.1	88	end
4.038	1.7	-1.8	87
4.071	3.1	5.3	89.8
4.103	2.9	16.8	98.5
4.135	3.4	25.8	111.9
4.167	3.5	33.2	129.3
4.199	4.6	40.2	150.2
4.231	6.1	49.8	176.1
4.263	7.7	60.5	207.6
4.295	9	70.3	244.3
4.327	10.5	78.8	285.3
4.359	11.8	86.1	330.1
4.391	13	91.2	377.7
4.423	13.9	95.2	427.3
4.455	14.6	96.5	477.5
4.487	15.1	96.3	527.7
4.519	15.8	94.4	576.9
4.551	16.1	92.2	624.9
4.583	16.4	88.2	670.8
4.615	16.7	83.4	714.3
4.647	16.7	78.3	755.1
4.679	17	72.8	793
4.712	16.9	67.1	827.9
4.744	17.2	60.3	859.3
4.776	17.2	53.9	887.4
4.808	16.9	46.4	911.6
4.84	16.2	36.7	930.7
4.872	13	23.6	943
4.904	9.3	-0.2	942.9
4.936	10.3	-22.1	931.4
4.968	6.5	-33.3	914
5	7.5	-50.6	887.7
5.032	6.7	-57.1	857.9
5.064	7.1	-63.6	824.8
5.096	6.7	-68.1	789.3
5.128	6.9	-73.4	751.1
5.16	7	-77	711
5.192	7.1	-80.6	669
5.224	7.1	-82.6	626
5.256	6.3	-79.7	584.5
5.288	5.8	-75.9	545
5.321	5.2	-71.8	507.6
5.353	4.7	-68	472.2
5.385	4.3	-64.1	438.8
5.417	3.8	-60.1	407.5
5.449	3.6	-56.5	378.1
5.481	3.3	-52.6	350.7
5.513	3.1	-48.8	325.3
5.545	2.9	-45.1	301.8
5.577	3	-41.4	280.2
5.609	3	-37.3	260.8
5.641	3	-33.6	243.3
5.673	3.1	-30.1	227.6
5.705	3.3	-26.5	213.8
5.737	3.5	-22.9	201.9
5.769	3.8	-19.4	191.8
5.801	3.8	-16.2	183.3
5.833	3.9	-13.8	176.1
5.865	4	-12	169.9
5.897	4	-10.5	164.4
5.929	4.2	-8.7	159.9
5.962	4.1	-7.3	156.1
5.994	4.2	-6.2	152.8
6.026	4.3	-5.2	150.1
6.058	4.2	-4.3	147.9
6.09	4.3	-4	145.8
6.122	4.3	-3.3	144.1	pulse width(Δt)=		0.481
6.154	4.1	-2.9	140.6	satrt
6.186	3.5	-4.6	140.2
6.218	3.1	-6.2	137	ΔP	ΔQ	ΔV	x	y	n
6.25	2.9	-7.8	132.9
6.282	2.6	-8.6	128.4								R=	10.792
6.314	2.4	-9.2	123.6	-1.7	-6.3	-17	161.905	16.1905	1		C=	35.8423
6.346	2.2	-9.6	118.6	-1.9	-6.7	-22	197.015	17.0149	2
6.378	2.1	-9.8	113.5	-2	-6.9	-27.1	235.652	17.3913	3
6.41	2.1	-9.6	108.5	-2	-6.7	-32.1	287.463	17.9104	4
6.442	2.1	-8.8	103.9	-2	-5.9	-36.7	373.22	20.339	5
6.474	2.1	-8	99.8	-2	-5.1	-40.8	480	23.5294	6
6.506	2.1	-7.1	96.1	-2	-4.2	-44.5	635.714	28.5714	7
6.538	2.1	-6.4	92.8	-2	-3.5	-47.8	819.429	34.2857	8
6.571	2.1	-5.5	89.9	end
6.603	1.7	-2.2	88.7
6.635	1.8	4.2	90.9
6.667	2.7	12.7	97.6
6.699	3.1	23.6	109.9
6.731	3.2	32.2	126.7
6.763	3.2	38.2	146.6
6.795	4.3	43.7	169.3
6.827	5.8	52	196.4
6.859	7.3	61.9	228.7
6.891	8.8	71.2	265.7
6.923	16.5	80.9	730.8
6.955	16.9	75.3	770.1
6.987	16.9	70.2	806.7
7.019	16.9	64.2	840.1
7.051	17.2	57.8	870.2
7.083	16.7	51.3	896.9
7.115	15.8	41.9	918.8
7.147	12.2	28.1	933.4
7.179	9.1	4	935.5
7.212	9.9	-16.5	926.9
7.244	6.6	-26.7	913
7.276	6.9	-43.3	890.4
7.308	6.4	-50.6	864.1
7.34	6.5	-57.4	834.2
7.372	6.5	-61.8	802
7.404	6.3	-66.5	767.4
7.436	6.6	-71.3	730.3
7.468	6.7	-74.9	691.3
7.5	6.9	-78.5	650.4
7.532	6.8	-80.4	608.5
7.564	6.1	-78	567.9
7.596	5.6	-74.2	529.2
7.628	5	-70.2	492.7
7.66	4.5	-66.3	458.1
7.692	4.1	-62.4	425.6
7.724	3.7	-58.5	395.1
7.756	3.5	-54.9	366.6
7.788	3.2	-51	340
7.821	3	-47.2	315.4
7.853	3	-43.6	292.7
7.885	3	-39.6	272.1
7.917	3	-35.7	253.5
7.949	3	-32.1	236.8
7.981	3.2	-28.6	221.9
8.013	3.3	-24.9	208.9
8.045	3.6	-21.5	197.7
8.077	3.8	-17.9	188.4
8.109	3.8	-15.2	180.5
8.141	3.9	-13	173.7
8.173	3.9	-11.3	167.8
8.205	4.2	-9.6	162.8
8.237	4	-7.8	158.7
8.269	4.3	-7	155.1
8.301	4.3	-5.7	152.1
8.333	4.3	-4.7	149.7
8.365	4.4	-4	147.6	pulse width(Δt)=		0.481
8.397	4.3	-3.3	144.9	satrt
8.429	3.7	-3.2	144.2
8.462	3.5	-5.4	141.4
8.494	3	-6.8	137.8
8.526	2.8	-8.3	133.5								R=	10.903
8.558	2.6	-9	128.8	ΔP	ΔQ	ΔV	x	y	n		C=	32.3625
8.59	2.4	-9.5	123.8	-1.9	-6.2	-21.1	204.194	18.3871	1
8.622	2.2	-9.9	118.7	-2.1	-6.6	-26.2	238.182	19.0909	2
8.654	2.2	-10.1	113.4	-2.1	-6.8	-31.5	277.941	18.5294	3
8.686	2.1	-9.5	108.5	-2.2	-6.2	-36.4	352.258	21.2903	4
8.718	2.1	-8.8	103.9	-2.2	-5.5	-41	447.273	24	5
8.75	2.1	-7.9	99.8	-2.2	-4.6	-45.1	588.261	28.6957	6
8.782	2.1	-7.1	96.1	-2.2	-3.8	-48.8	770.526	34.7368	7
8.814	2.1	-6.4	92.8	-2.2	-3.1	-52.1	1008.39	42.5806	8
8.846	2.1	-5.7	89.8
8.878	2.1	-4.9	87.2	end
8.91	1.9	-1.6	86.4
8.942	3.6	6.9	90
8.974	3.1	18.4	99.6
9.006	4.1	26.9	113.6
9.038	5.4	37.3	133
9.071	6.9	48.9	158.5
9.103	8.4	60.2	189.8
9.135	9.8	70.6	226.6
9.167	11.1	79.1	267.8
9.199	12.3	86.3	312.7
9.231	13.2	91.4	360.3
9.263	14.3	94.7	409.6
9.295	14.7	96.4	459.8
9.327	15.4	96.1	509.8
9.359	15.7	94.5	559
9.391	16	91.8	606.9
9.423	16.3	88.3	652.9
9.455	16.5	84.2	696.7
9.487	16.6	79.5	738.2
9.519	17	74.3	776.9
9.551	16.8	69.2	812.9
9.583	16.9	62.8	845.6
9.615	17.1	56.8	875.2
9.647	16.3	49.8	901.1
9.679	14.3	39	921.4
9.712	10.2	20	931.9
9.744	9.5	-3.7	929.9
9.776	8.5	-17.7	920.7
9.808	6.3	-31	904.5
9.84	6.9	-43.8	881.7
9.872	5.9	-50.2	855.6
9.904	6.6	-57.3	825.7
9.936	6.3	-60.9	794
9.968	6.3	-66	759.6
10	9.5	-1.9	930.7
10.032	9.1	-17	921.8
10.064	6.1	-29.5	906.5
10.096	7	-44.1	883.5
10.128	6	-50.1	857.4
10.16	6.6	-57.4	827.5
10.192	6.3	-61.2	795.6
10.224	6.3	-66.3	761.1
10.256	6.5	-70.7	724.3
10.288	6.6	-74.3	685.6
10.32	6.8	-77.9	645
10.352	6.7	-79.9	603.4
10.384	6	-77.4	563.1
10.416	5.5	-73.6	524.7
10.448	4.9	-69.7	488.4
10.48	4.5	-65.9	454.1
10.512	4	-61.9	421.9
10.544	3.7	-58.1	391.6
10.576	3.4	-54.3	363.3
10.608	3.2	-50.5	337
10.64	3	-46.7	312.7
10.672	3	-43.1	290.2
10.704	3.1	-39.1	269.9
10.736	3	-35.1	251.6
10.768	3	-31.6	235.1
10.8	3.3	-28.1	220.5
10.832	3.3	-24.4	207.8
10.864	3.6	-21	196.8
10.896	3.8	-17.6	187.7
10.928	3.8	-14.8	180
10.96	3.9	-12.8	173.3
10.992	4	-11.1	167.5
11.024	4.3	-9.2	162.7
11.056	4	-7.6	158.8
11.088	4.3	-6.8	155.2
11.12	4.3	-5.5	152.4
11.152	4.3	-4.6	150
11.184	4.3	-3.9	147.9	pulse width(Δt)=		0.48
11.216	4.3	-3.5	146.1	satrt
11.248	3.4	-4	144
11.28	3.4	-6.5	140.6
11.312	3	-7.6	136.6
11.344	2.7	-8.8	132.1								R=	10.513
11.376	2.5	-9.5	127.1	ΔP	ΔQ	ΔV	x	y	n		C=	31.746
11.408	2.3	-9.9	121.9	-2	-6.4	-24.2	226.875	18.75	1
11.44	2.1	-10.1	116.7	-2.2	-6.6	-29.4	267.273	20	2
11.472	2.1	-10.1	111.4	-2.2	-6.6	-34.7	315.455	20	3
11.504	2.1	-9.5	106.4	-2.2	-6	-39.7	397	22	4
11.536	2.1	-8.5	102	-2.2	-5	-44.1	529.2	26.4	5
11.568	2.1	-7.7	98	-2.2	-4.2	-48.1	687.143	31.4286	6
11.6	2.1	-6.7	94.5	-2.2	-3.2	-51.6	967.5	41.25	7
11.632	2.1	-6.1	91.4	-2.2	-2.6	-54.7	1262.31	50.7692	8
11.664	2.1	-5.5	88.5
11.696	2.1	-4.7	86	end
11.728	2.6	-1.3	85.4
11.76	3.2	8.9	90
11.792	3.4	18.6	99.7
11.824	3.8	27.2	113.8
11.856	5.1	36.3	132.7
11.888	6.5	47.3	157.4
11.92	8	58.4	187.8
11.952	9.3	68.6	223.5
11.984	10.6	77	263.6
12.016	11.9	84.3	307.5
12.048	12.9	89.8	354.3
12.08	13.7	93.7	403
12.112	14.4	95.1	452.6
12.144	15.2	95.2	502.2
12.176	15.3	94.3	551.3
12.208	15.8	91.4	598.9
12.24	16.2	88.3	644.9
12.272	16.4	84.7	689
12.304	16.5	80.3	730.8
12.336	16.9	75.1	770
12.368	16.9	70	806.4
12.4	16.8	64	839.8
12.432	16.8	57.6	869.7
12.464	16	49.5	895.5
12.496	13.1	37.4	915
12.528	9.6	15.8	923.2
12.56	9.3	-6.1	920.1
12.592	7.7	-18.2	910.6
12.624	6.3	-32.3	893.8
12.656	6.7	-42.9	871.4
12.688	5.8	-49.5	845.6
12.72	6.5	-56.1	816.4
12.752	6.1	-59.8	785.3
12.784	6.2	-64.8	751.5
12.816	6.3	-69.3	715.4
12.848	6.5	-73.3	677.2
12.88	6.7	-76.8	637.2
12.912	6.5	-79	596.1
12.944	5.9	-76.6	556.2
12.976	2.9	-43.9	294.6
13.008	3.1	-40.1	273.8
13.04	3	-35.9	255
13.072	2.9	-32.5	238.1
13.104	3.2	-29.1	223
13.136	3.3	-25.2	209.8
13.168	3.6	-21.8	198.5
13.2	3.7	-18.2	189
13.232	3.8	-15.4	181
13.264	3.8	-13.2	174.1
13.296	4	-11.4	168.2
13.328	4.3	-9.6	163.2
13.36	4	-7.7	159.2
13.392	4.2	-7	155.6
13.424	4.2	-5.8	152.5
13.456	4.4	-4.9	150
13.488	4.4	-4	147.9	pulse width(Δt)=		0.48
13.52	4.2	-3.5	141.1	satrt
13.552	3.9	-3.1	140.5
13.584	3.5	-5	140.9
13.616	3.1	-6.5	138.5
13.648	2.9	-7.9	134.4								R=	10.606
13.68	2.7	-8.7	129.8	ΔP	ΔQ	ΔV	x	y	n		C=	31.1526
13.712	2.4	-9.4	121.9	-1.8	-5.9	-19.2	195.254	18.3051	1
13.744	2.2	-9.8	118.8	-2	-6.3	-22.3	212.381	19.0476	2
13.776	2.2	-10.1	115.6	-2	-6.6	-25.5	231.818	18.1818	3
13.808	2	-10.6	106.5	-2.2	-7.1	-34.6	292.394	18.5915	4
13.84	2.2	-9.2	101.9	-2	-5.7	-39.2	412.632	21.0526	5
13.872	2.1	-8	100.7	-2.1	-4.5	-40.4	538.667	28	6
13.904	2.1	-7.3	96.9	-2.1	-3.8	-44.2	697.895	33.1579	7
13.936	2.1	-6.5	93.5	-2.1	-3	-47.6	952	42	8
13.968	2.1	-5.9	90.4
14	2.1	-5.1	87.8	end
14.032	1.9	-1.8	86.8
14.064	3.3	6.2	90.1
14.096	3	17.7	99.3
14.128	3.5	26.3	113
14.16	4.6	34.8	131.1
14.192	6	45.1	154.6
14.224	7.4	56	183.8
14.256	8.8	66.4	218.3
14.288	10.2	75.3	257.5
14.32	11.4	82.9	300.7
14.352	12.4	88.7	346.9
14.384	13.5	92.5	395.1
14.416	14.2	95	444.6
14.448	15	95.5	494.3
14.48	15.3	95.1	543.8
14.512	15.7	92.6	592.1
14.544	16.1	89.3	638.5
14.576	16.6	85.6	683.1
14.608	16.6	82.1	725.9
14.64	16.8	76.6	765.8
14.672	16.9	71.2	802.9
14.704	16.8	64.9	836.7
14.736	17.2	58.2	867
14.768	17	52.1	894.1
14.8	16.3	43.6	916.9
14.832	13.8	31.9	933.5
14.864	9.7	10.8	939.1
14.896	9.9	-13.3	932.2
14.928	7.6	-24.9	919.2
14.96	6.7	-40.8	898
14.992	6.9	-50.9	871.5
15.024	6.5	-57.2	841.7
15.056	6.7	-62.6	809.1
15.088	6.4	-67	774.2
15.12	6.7	-71.9	736.7
15.152	6.7	-75.5	697.4
15.184	6.9	-79.2	656.1
15.216	6.9	-81.2	613.8
15.248	6.2	-78.5	572.9
15.28	5.6	-74.8	534
15.312	5	-70.7	497.1
15.344	4.5	-66.9	462.3
15.376	4.2	-62.9	429.5
15.408	3.8	-59	398.8
15.44	3.5	-55.3	370
15.472	3.2	-51.4	343.2
15.504	3	-47.7	318.3
15.536	2.9	-44	295.4
15.568	3.1	-40.2	274.4
15.6	3	-36.1	255.6
15.632	3	-32.5	238.7
15.664	3.2	-29	223.6
15.696	3.3	-25.3	210.4
15.728	3.6	-22	199
15.76	3.6	-18.3	189.4
15.792	3.8	-15.6	181.3
15.824	3.9	-13.2	174.4
15.856	4	-11.4	168.5
15.888	4.2	-9.7	163.4
15.92	4	-7.8	159.3
15.952	4.3	-7	155.7
15.984	4.3	-5.8	152.7
16.016	4.4	-4.8	150.2
16.048	4.2	-4	148.1
16.08	4.3	-4	144.8	pulse width(Δt)=		0.48
16.112	4.2	-3.3	139.2	satrt
16.144	3.5	-4.7	141.8
16.176	3.2	-6.4	138.5
16.208	2.9	-7.7	134.5
16.24	2.7	-8.6	130								R=	10.717
16.272	2.4	-9.3	125.1	ΔP	ΔQ	ΔV	x	y	n		C=	30.03
16.304	2.3	-9.8	120	-1.9	-6.5	-19.2	177.231	17.5385	1
16.336	2.1	-9.9	114.8	-2.1	-6.6	-24.4	221.818	19.0909	2
16.368	2.1	-9.7	109.8	-2.1	-6.4	-29.4	275.625	19.6875	3
16.4	2.2	-9	105.1	-2	-5.7	-34.1	358.947	21.0526	4
16.432	2.1	-8.1	100.9	-2.1	-4.8	-38.3	478.75	26.25	5
16.464	2.1	-7.3	97.1	-2.1	-4	-42.1	631.5	31.5	6
16.496	2.1	-6.5	93.7	-2.1	-3.2	-45.5	853.125	39.375	7
16.528	2.1	-5.9	90.6	-2.1	-2.6	-48.6	1121.54	48.4615	8
16.56	2.1	-5.1	87.9
16.592	1.8	-1.8	87	end
16.624	3.1	5.5	89.8
16.656	2.9	17	98.7
16.688	3.7	26	112.2
16.72	4.9	35.7	130.8
16.752	6.4	46.7	155.2
16.784	7.9	58.1	185.4
16.816	9.2	68.5	221.1
16.848	10.5	76.9	261.2
16.88	11.9	84.2	305
16.912	12.8	90.1	351.9
16.944	13.9	93.6	400.7
16.976	14.4	95.8	450.6
17.008	15.2	95.9	500.6
17.04	15.4	94.8	550
17.072	15.8	91.9	597.8
17.104	16.1	88.5	643.9
17.136	16.5	85	688.2
17.168	16.5	80.8	730.3
17.2	16.9	75.2	769.4
17.232	16.9	70.2	806
17.264	16.8	64.1	839.4
17.296	17.2	57.7	869.4
17.328	16.5	51.2	896.1
17.36	15.3	41.4	917.6
17.392	11.2	25.4	930.8
17.424	9.2	0.6	931.1
17.456	9.4	-16.9	922.3
17.488	6.4	-28	907.8
17.52	7	-43.2	885.2
17.552	6.1	-50	859.2
17.584	6.6	-57.3	829.4
17.616	6.4	-61.3	797.5
17.648	6.3	-66.3	763
17.68	6.5	-70.9	726.1
17.712	6.6	-74.4	687.3
17.744	6.8	-78	646.7
17.776	6.7	-80	605
17.808	6	-77.6	564.5
17.84	5.5	-73.8	526.1
17.872	5	-69.8	489.7
17.904	4.5	-66	455.3
17.936	4.1	-62.1	423
17.968	3.7	-58.3	392.6
18	3.4	-54.5	364.2
18.032	3.2	-50.7	337.8
18.064	3	-46.9	313.4
18.096	2.9	-43.3	290.9
18.128	3	-39.4	270.3
18.16	3	-35.3	251.9
18.192	3	-31.8	235.4
18.224	3.2	-28.4	220.6
18.256	3.4	-24.6	207.7
18.288	3.6	-21.1	196.8
18.32	3.7	-17.6	187.6
18.352	3.8	-15	179.8
18.384	3.9	-13	173
18.416	3.9	-11.2	167.1
18.448	4.2	-9.7	162.1
18.48	4	-7.8	158
18.512	4.3	-6.9	154.4
18.544	4.3	-5.5	151.6
18.576	4.3	-4.6	149.2
18.608	4.4	-3.8	147.2	pulse width(Δt)=		0.48
18.64	4.4	-3.3	145.5	satrt
18.672	3.5	-3.6	143.6	ΔP	ΔQ	ΔV	x	y	n
18.704	3.5	-6	140.5
18.736	3	-7.2	136.8
18.768	2.8	-8.4	132.4								R=	10.714
18.8	2.6	-9.1	127.7								C=	30.7692
18.832	2.3	-9.7	122.7
18.864	2.1	-9.9	117.5	-2.3	-6.6	-28	254.545	20.9091	1
18.896	2.1	-10.1	112.2	-2.3	-6.8	-33.3	293.824	20.2941	2
18.928	2.1	-9.6	107.2	-2.3	-6.3	-38.3	364.762	21.9048	3
18.96	2.1	-8.7	102.7	-2.3	-5.4	-42.8	475.556	25.5556	4
18.992	2.2	-7.8	98.7	-2.2	-4.5	-46.8	624	29.3333	5
19.024	2.1	-6.9	95.1	-2.3	-3.6	-50.4	840	38.3333	6
19.056	2.1	-6.2	91.9	-2.3	-2.9	-53.6	1108.97	47.5862	7
19.088	2.1	-5.5	89
19.12	2.1	-4.8	86.5	end
19.152	2.2	-1.4	85.7
19.184	3.4	8.1	90
19.216	3.2	18.6	99.7
19.248	4	26.9	113.7
19.28	5.4	37	133
19.312	6.8	48.5	158.2
19.344	8.2	59.7	189.3
19.376	9.5	69.8	225.6
19.408	10.8	77.8	266.2
19.44	12	85	310.4
19.472	13	90.3	357.5
19.504	13.8	93.9	406.4
19.536	14.6	95.3	456
19.568	15.3	95.5	505.8
19.6	15.4	94.3	554.9
19.632	16	91.4	602.5
19.664	16	88.4	648.6
19.696	16.5	84.1	692.4
19.728	16.5	79.8	734
19.76	16.9	74.6	772.8
19.792	17	69.7	809.2
19.824	16.9	63.8	842.4
19.856	17.2	57.4	872.3
19.888	16.5	50.9	898.8
19.92	14.8	40.5	919.9
19.952	10.6	22.7	931.7
